# Supplementary material
Source: HighWire-hosted journal article supplement (https://bmjopenrespres.bmj.com/content/suppl/2021/09/07/8.1.e000917)

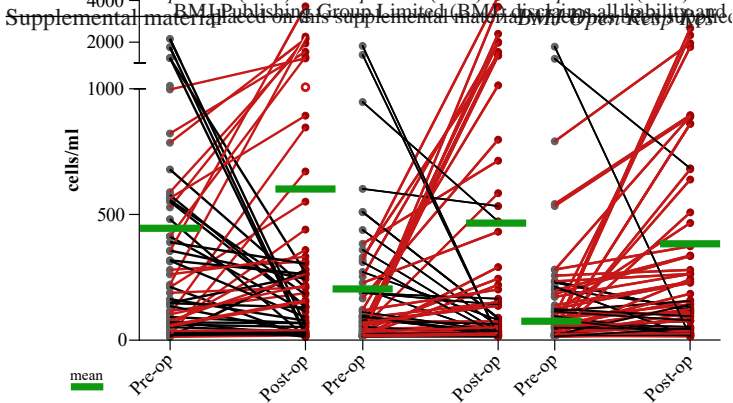

Supplement: bmjresp-2021-000917supp001_data_supplement.pdf [file bmjresp-2021-000917supp001_data_supplement.pdf]
